# Supplementary material
Source: Springer Nature journal article supplement (https://www.springermedizin.de/resource/supplementary/13014_2010_298_MOESM4_ESM.pdf/9633376)

**Volume (%)**

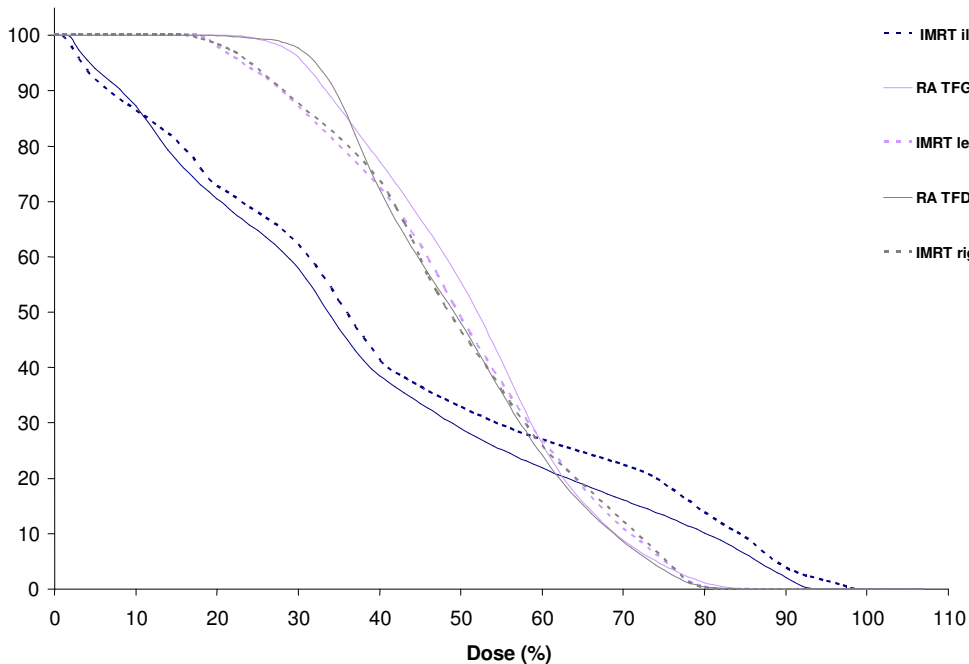

— RA iliac crest

- - - IMRT iliac crest

— RA TFG

- - - IMRT left FH

— RA TFD

- - - IMRT right FH

Supplement: MOESM4 [file 9633376]
